# Supplementary material
Source: publisher figshare collection journal article supplement (https://karger.figshare.com/ndownloader/files/31714586)
Supplement: Supplementary file 1 [file 31714586]

| Supplementary table 2A: Univariate associations between Fazekas score (0 vs. ≥1) and atrial measurements | | | |
| --- | --- | --- | --- |
| Univariable binomial log reg | SR, n=172  OR (95% CI) | AF, n=28  OR (95% CI) | All, n=200  OR (95% CI) |
| LAmax pr. 10 mL/m2 | 1.02 (0.73; 1.47) | 0.77 (0.27; 1.89) | 0.98 (0.72; 1.37) |
| LAmin pr. 10 mL/m2 | 1.35 (0.81; 2.47) | 0.73 (0.19; 2.47) | 1.21 (0.77; 2.01) |
| LATEF pr. 5% | 0.65 (0.44; 0.93)* | 1.18 (0.53; 2.69) | 0.73 (0.53; 1.00) |
| LAPEF pr. 5% | 0.47 (0.28; 0.76)** | 2.21 (0.81; 8.31) | 0.63 (0.40; 0.96)* |
| LAAEF pr. 5% | 0.78 (0.57; 1.07) | 1.04 (0.42; 2.55) | 0.82 (0.61; 1.09) |
| LV peak filling rate pr. 10 ml/s | 0.95 (0.92; 0.99)* | 0.98 (0.88; 1.08) | 0.96 (0.92; 0.99)* |
| Supplementary table 2B: Univariable associations between lacunar infarcts (0 vs. ≥1) and atrial measurements | | | |
|  | SR, n=172  OR (95% CI) | AF, n=28  OR (95% CI) | All, n=200  OR (95% CI) |
| LAmax pr. 10 mL/m2 | 1.38 (1.08; 1.78)* | 1.56 (0.80; 3.36) | 1.40 (1.12; 1.79)** |
| LAmin pr. 10 mL/m2 | 1.53 (1.09; 2.20)* | 2.23 (0.88; 6.72) | 1.62 (1.17; 2.28)** |
| LATEF pr. 5% | 0.82 (0.65; 1.03) | 0.63 (0.30; 1.16) | 0.78 (0.63; 0.97)* |
| LAPEF pr. 5% | 0.76 (0.55; 1.04) | 0.84 (0.39; 1.70) | 0.77 (0.58; 1.02) |
| LAAEF pr. 5% | 0.90 (0.73; 1.12) | 0.61 (0.28; 1.16) | 0.86 (0.70; 1.05) |
| LV peak filling rate pr. 10 ml/s | 0.98 (0.96; 1.01) | 0.98 (0.91; 1.05) | 0.98 (0.96; 1.01) |
| Caption: This table shows OR (95% CI) for logistic regression models between Fazekas score (0 vs. ≥1) or lacunar infarcts (0 vs. ≥1), respectively and indicated atrial findings in participants with implantable loop recorder documented sinus rhythm (SR) during three months of monitoring; with atrial fibrillation (AF) episodes during monitoring; and for all participants, respectively.  * p<0.05, **p<0.01  LAmax, left atrial maximum volume; LAmin, left atrial minimum volume; LATEF, left atrial total emptying fraction; LAPEF, left atrial passive emptying fraction; LAAEF, left atrial active emptying fraction | | | |
